# Supplementary material
Source: Springer Nature journal article supplement (https://www.springermedizin.de/resource/supplementary/12943_2012_1091_MOESM9_ESM.pdf/9552326)
Supplement: MOESM9 [file 9552326]

### Supplementary Table 8: Nanostring probe design.

| <u>Probe Name</u> | <u>Target Sequence</u>                                                                                   |
|-------------------|----------------------------------------------------------------------------------------------------------|
| uc.106+           | GCTATTAAGCTGAATGGTGATGGTGTGAAGTATAGTTAAATTGGGTGAAATTAAGCAAATTAAGCAAACTCCGGGATGTGGAAATCTGAAAATAGAAAACCACC |
| uc.283+           | TGAAATTTTCAAGTCAGGGGCGCGGGATTGGATCAAATCACATAAACTGCAAAAAAGCAAGTCTAATGGCGCATAATTGGTTCTGTAATAGCATTACAC      |
| uc.283+A          | CCCCTTAATATCATAAAGGCTTCCGCCAGGGAAGCACTTAATAGTGCAGGGGGCCGTAACGGGCTATTATCCTGGTGTAAATGCTATTACAGAACCAAT      |
| uc.287+           | TTGCAGATAATTTTCAGTGCTCAGATCTCTGTGTAGTATTGATGGGGAGGGTGGTTGATTAGGACCTTGGGAATTGTGCTTGATGGGAACAATCTGGAAG     |
| uc.363+A          | CCCTATGTGGCTTGAATGACAGTTGTTAAGTTGAAAAAGGGACAGTGTGATGGGAATGCCACTTTAAATCTCAATTACCTCCTCCACTCCAATCAGCTTG     |
| uc.454+A          | TCTATGGAAAAGACTGTTAAGCTGTCAAATAGTGAACACTCCTCGGTAGTCCCGATGCCGTGATCATGGTTTTGGTCTCGTTTTCTTTAGGTTACCCCTG     |
| uc.477+           | ATTCTTTGGAGCGGGTGTGTCATTGTTTGGGAAAATGGCTAGGACATCCCGACAAGGTGATCATCCTCAGGATTTTGTGGCAATAACAAGGGGTGGGGGA     |
| GUSB              | CGGTCGTGATGTGGTCTGTGGCCAACGAGCCTGCGTCCACCTAGAATCTGCTGGCTACTACTTGAAGATGGTGATCGCTCACACCAAATCCTTGGACCC      |
